# Supplementary material for: Characterization of the High-Affinity Drug Ligand Binding Site of Mouse Recombinant TSPO
Source: PubMed Central journal article supplement (PMC6470738; doi:10.3390/ijms20061444), 2019-03-21
Supplement: ijms-20-01444-s001.pdf [file ijms-20-01444-s001.pdf]

Figure S1

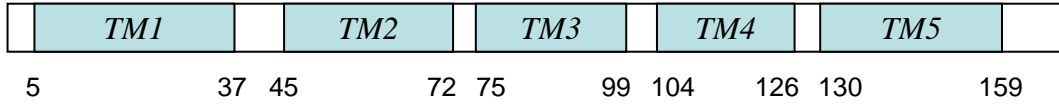

| Yeast mitochondria                                   | PK 11195 Kd (nM) | Bacterial protoplast                                  | PK 11195 binding % of control |
|------------------------------------------------------|------------------|-------------------------------------------------------|-------------------------------|
| Wild-type                                            | 6 ± 3            | Wild type                                             | 100                           |
| Δ2-20                                                | 25 ± 8           | Δ5-20                                                 | ~70                           |
| Δ15-35                                               | >200             | Δ41-51                                                | ~55                           |
| Δ158-159                                             | 10 ± 6           | Δ108-119                                              | ~70                           |
| Δ157-169                                             | 9 ± 3            | Δ120-133                                              | ~55                           |
| Δ156-169                                             | 10 ± 4           | Δ141-152                                              | ~75                           |
| Δ2-20,158-169                                        | >200             | Δ153-169                                              | ~75                           |
| Farges et al. (1994) <i>Mol Pharm</i> 46: 1160-1167. |                  | Li et al. (1998) <i>Endocrinology</i> 139: 4991-4997. |                               |

**Figure S1. (top) Diagram of the transmembrane helices of mTSPO** from the atomic NMR structure [9, PDB ID-2MGY]. **(bottom)** Table summarizing the deletion mutants of mammalian TSPO presented in the literature.

Figure S2

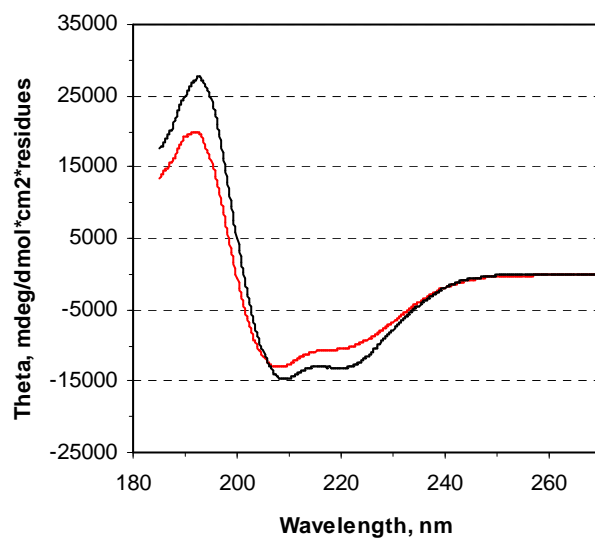

**Figure S2. Circular dichroism spectra of rec-mTSPO.** Spectra recorded in the presence of sodium dodecyl sulfate (SDS, red line) or in the presence of dodecylphosphocholine (DPC, black line) detergent.

Figure S3

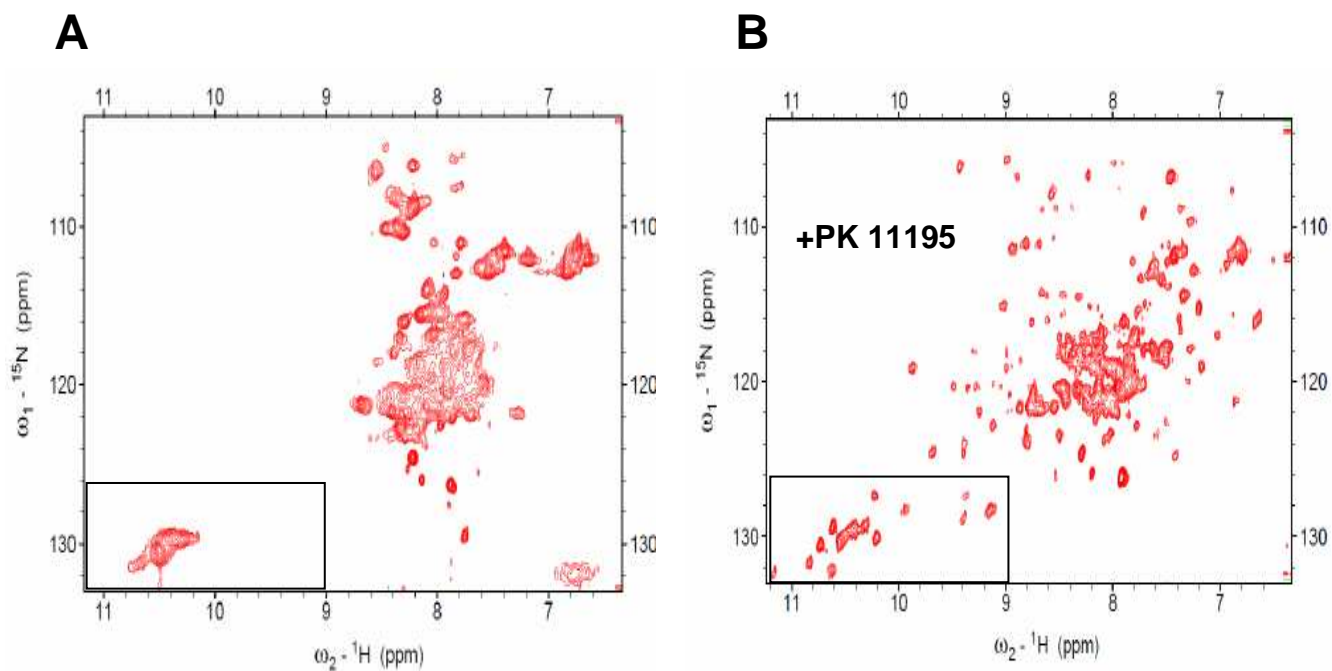

**Figure S3. Ligand-induced stabilization of the rec-mTSPO structure in dodecylphosphocholine (DPC) detergent.** 2D  $^1\text{H}$ - $^{15}\text{N}$  HSQC spectra of  $^{15}\text{N}$  labelled rec-mTSPO in DPC micelles in the absence (A) and in the presence (B) of PK 11195. Boxes focus on NH indole resonance of tryptophans.
